# Supplementary material for: Mosaic loss of chromosome Y promotes leukemogenesis and clonal hematopoiesis
Source: PubMed Central journal article supplement (PMC8855789; doi:10.1172/jci.insight.153768), 2022-02-08
Supplement: jciinsight-7-153768-s005.pdf [file jciinsight-7-153768-s005.pdf]

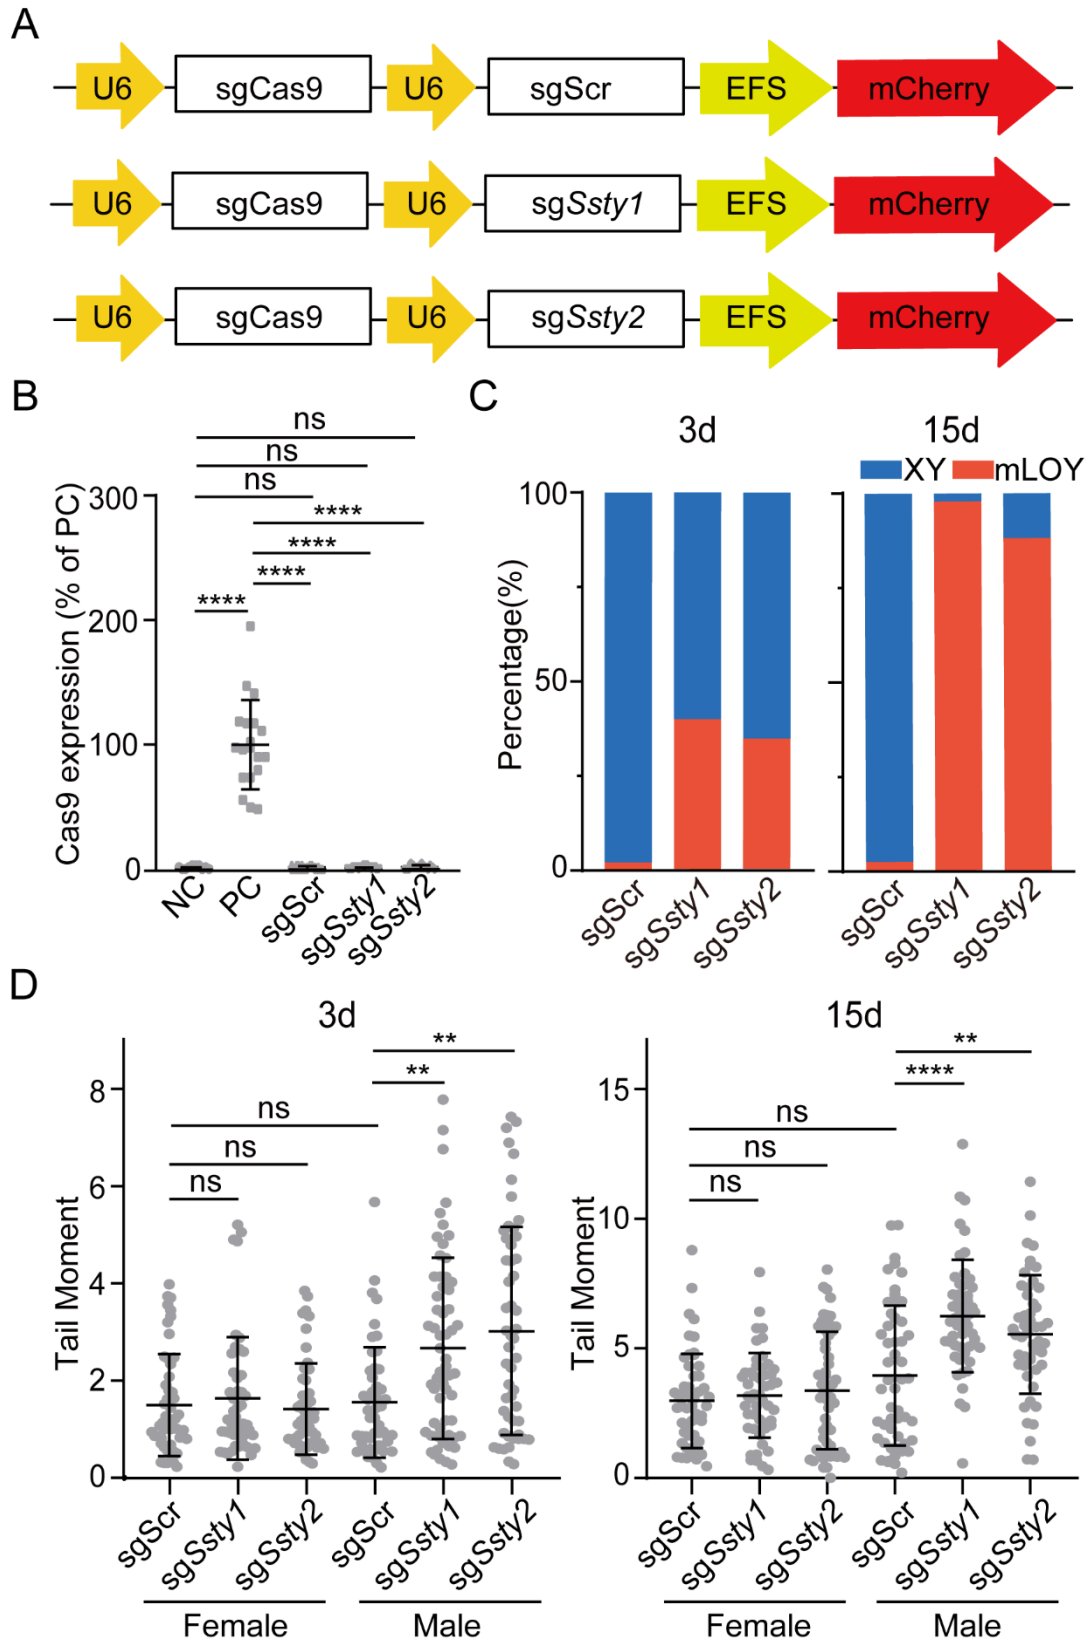

Supplementary Figure 1. A suicide sgCas9 depleted Cas9 in HSPCs.

A. Schematic representation of lentivirus vector expressing mCherry, U6-sgRNA

targeting Y chromosome (*sgSsty1*, *sgSsty2*) connected with U6-sgCas9 in one vector, U6-sgCas9-U6-sgScr was used as negative control. **B.** Statistical graph of Cas9 expression by immunofluorescent in HSPCs from WT mice (NC), HSPCs from Cas9 mice (PC), HSPCs from Cas9 mice with sgScr-sgCas9 (sgScr), *sgSsty1*-sgCas9 (*sgSsty1*) or *sgSsty2*-sgCas9 (*sgSsty2*). Statistical analysis represented on graph is relative to positive control (PC). ns, not significant; \*\*\*\* FDR  $q < 0.0001$  (Kruskal-Wallis test). **C.** Statistical graph of the percentages of mLOY in mCherry+ sgScr-sgCas9, *sgSsty1*-sgCas9 and *sgSsty2*-sgCas9 HSPCs at 3 days (left) and 15 days (right) after infection. **D.** HSPCs from female and male mice were infected with sgScr-sgCas9, *sgSsty1*-sgCas9 or *sgSsty2*-sgCas9. Comet assay of mCherry+ HSPCs was check at 3 days (left) and 15 days (right) after infection. The tail moment was shown as the means  $\pm$  SD. ns, not significant, \*\* FDR  $q < 0.01$ , \*\*\*\* FDR  $q < 0.0001$  (Kruskal-Wallis test).

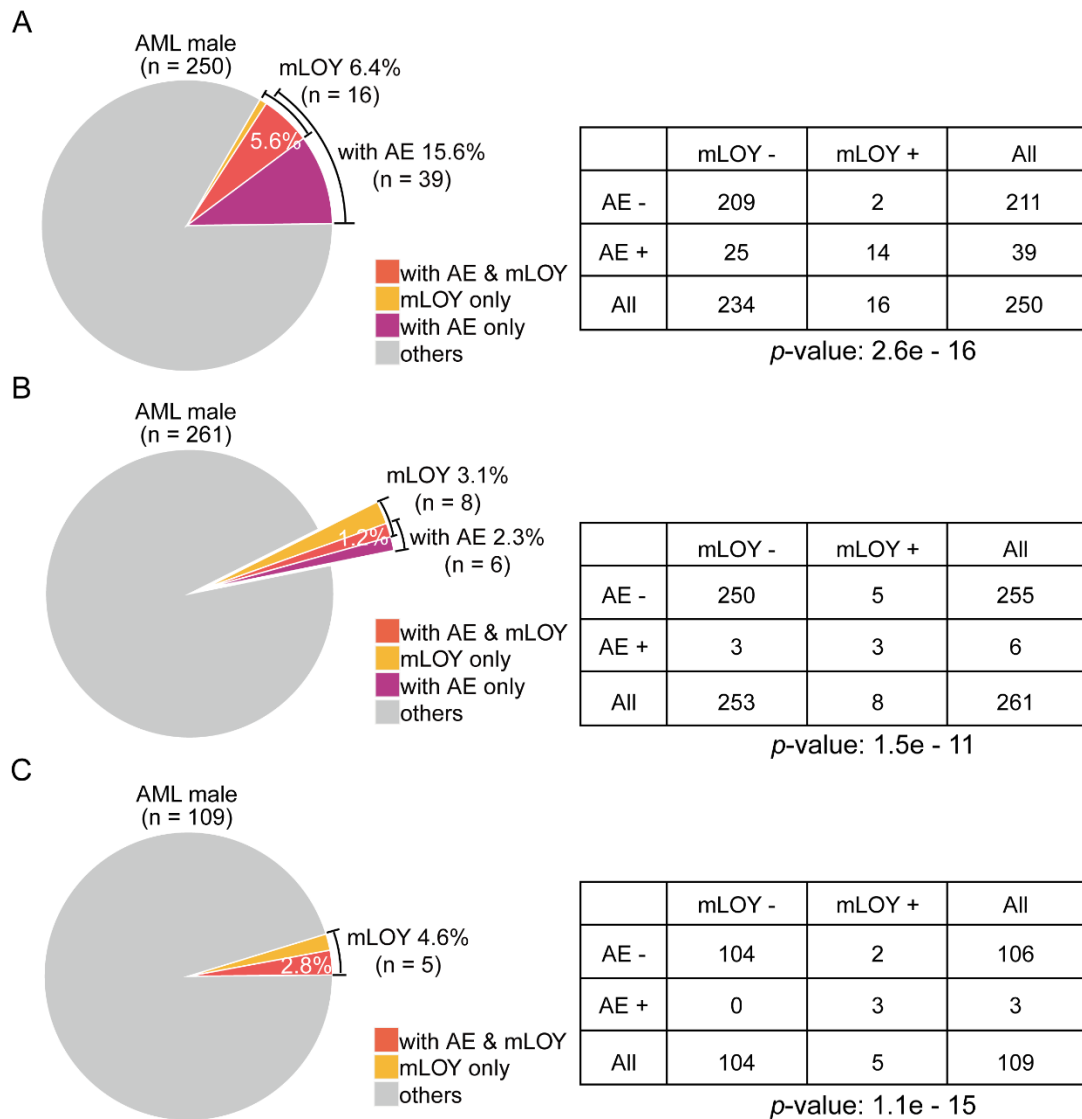

**Supplementary Figure 2. mLOY was associated with *AML1-ETO* in AML.**

**A-C.** Co-occurrence of *AML1-ETO* with mLOY in male AML patients. Pie charts showing ratios of mLOY and *AML1-ETO* in all-male AML patients from the TARGET AML cohort (A,  $p < 2.6e-16$ , Chi-square test), BEAT AML cohort (B,  $p < 1.5e-11$ , Chi-square test) and TCGA LAML cohort (C,  $p < 1.1e-15$ , Chi-square test).

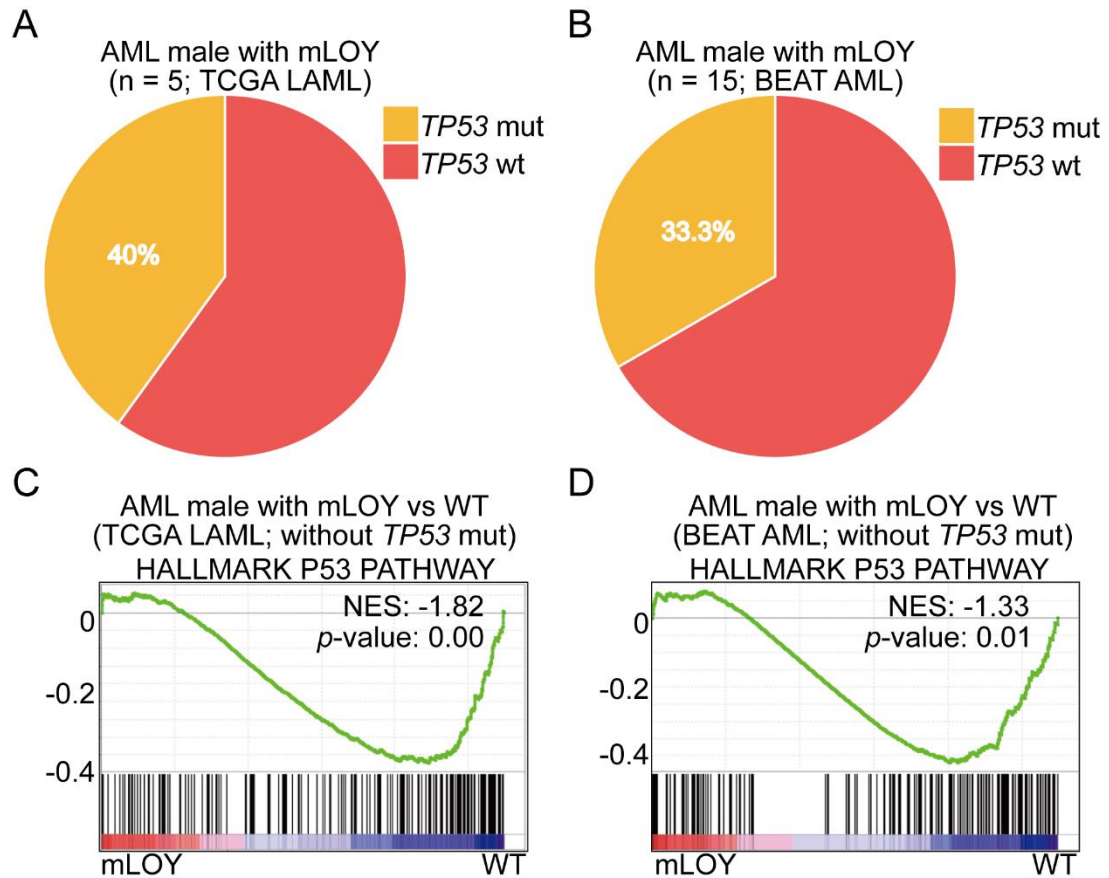

**Supplementary Figure 3. mLOY was associated with *TP53* mutations and/or downregulation of the p53 pathway.**

**A-B.** Pie charts showing ratios of *TP53* mutation in all mLOY AML male patients (A, TCGA LAML cohort; B, BEAT AML cohort). **C-D.** GSEA showing the negative enrichment of the HALLMARK\_P53\_PATHWAY in p53 intact AML patients with mLOY (C, TCGA LAML cohort; D, BEAT AML cohort).

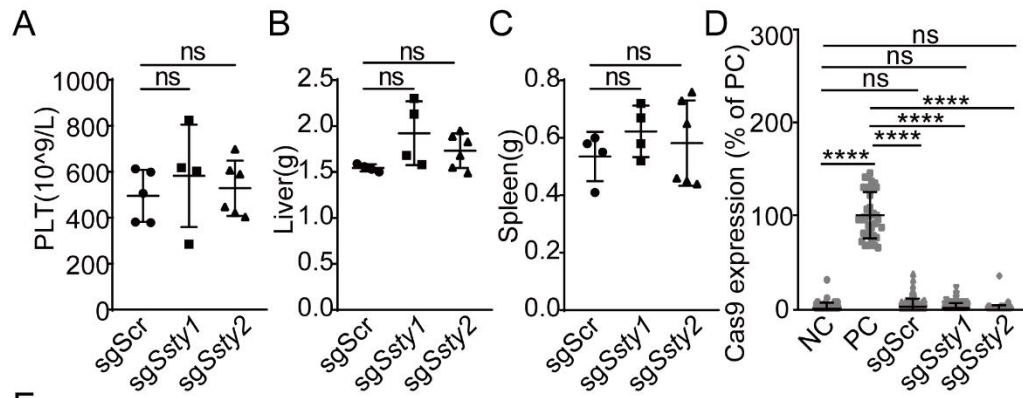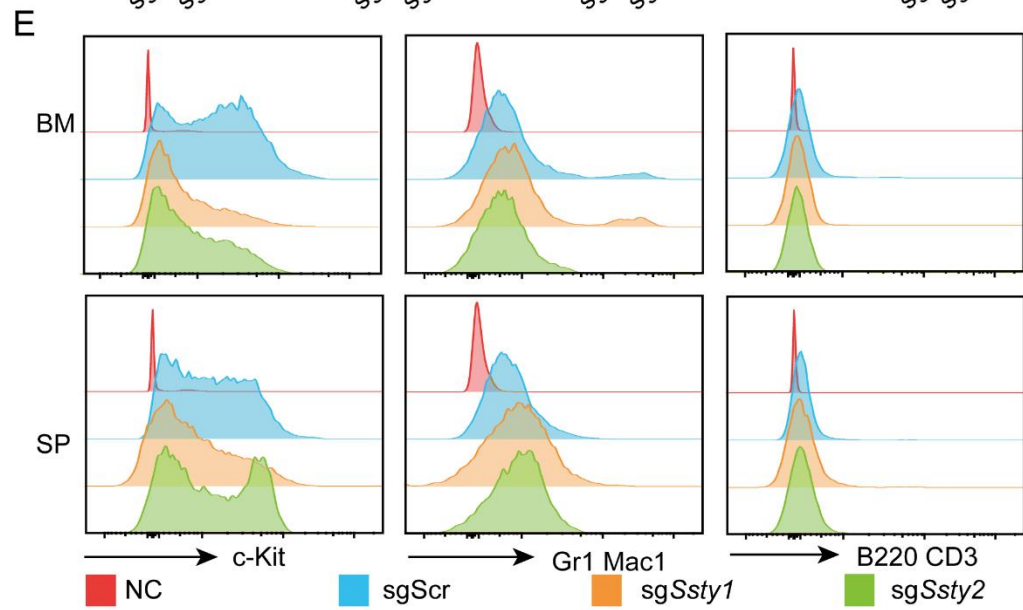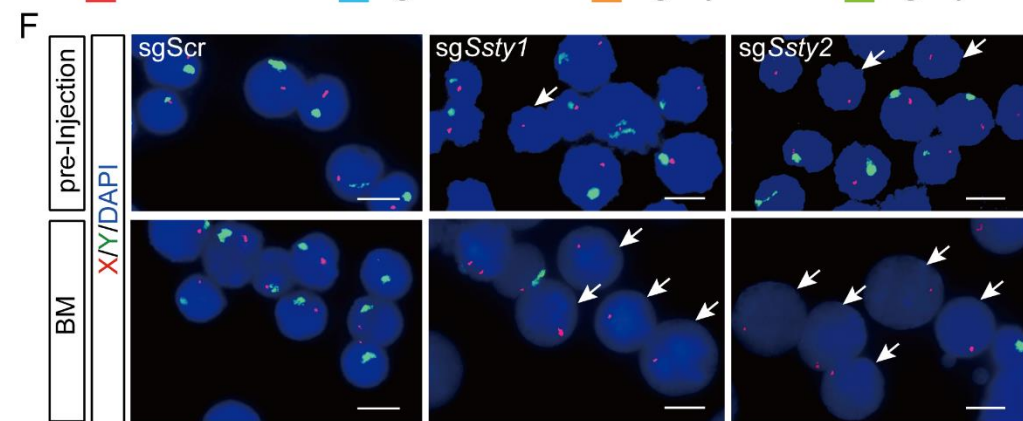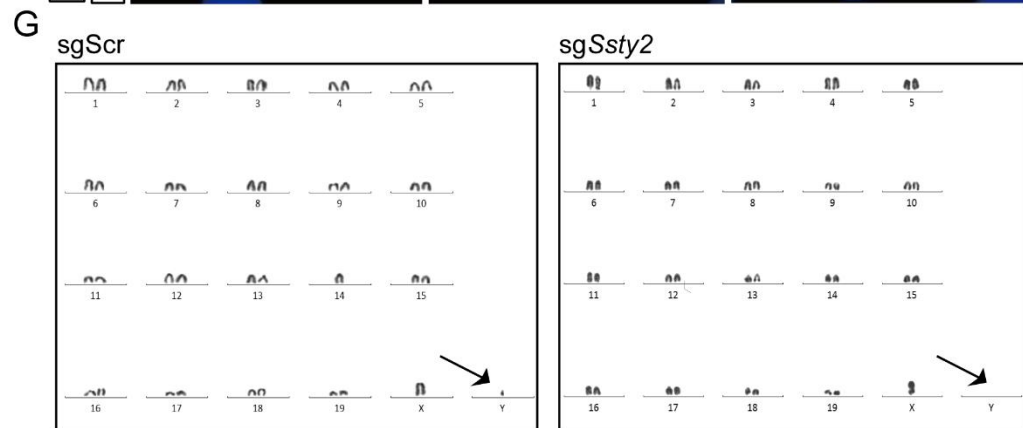

**Supplementary Figure 4. The role of mLOY in *AML1-ETO*+ AML.**

**A.** Number of platelet (PLT) in recipient mice at 7 weeks after transplantation, measured by complete blood cell counts. n=5,4,6. ns, not significant (One-way ANOVA). **B-C.** Weight of liver(B, n=4,4,6) and spleen(C, n=4,4,6) in transplanted AML mice. Data are showing means SD. ns, not significant (One-way ANOVA). **D.** Statistical graph of Cas9 expression by immunofluorescent of cells isolated from WT mice spleen (NC), Cas9 mice spleen (PC), sgScr tumor cells(sgScr) and mLOY tumor cells (sg*Ssty1* and sg*Ssty2*) with sgCas9. The statistical analysis represented on the graph is relative to a positive control (PC). 3 recipient mice were measured for each group. ns, not significant; \*\*\*\* FDR  $q < 0.0001$  (Kruskal-Wallis test). **E.** Flow cytometry analyses of the surface marker (c-kit; Gr1 and Mac1;B220 and CD3) of tumor cells from bone marrow (top) and spleen (bottom) in sgScr-sgCas9, sg*Ssty1*-sgCas9 and sg*Ssty2*-sgCas9 AML mice. **F.** Representative photomicrograph of FISH in sgScr-sgCas9;*AML1-ETO*, sg*Ssty1*-sgCas9;*AML1-ETO* and sg*Ssty2*-sgCas9;*AML1-ETO* HSPCs before injection (top) and blast cells in AML mice BM (bottom). Green, FITC-labeled whole-chromosome probe for Y chromosome; red, Texas red-labeled X chromosome probe for XqA7.3; blue, DAPI-labeled DNA. White arrows indicate XO cells, bar, 10 $\mu$ m. **G.** Cytogenetic analysis of splenocytes from sg*Ssty2*-sgCas9; *AML1-ETO* AML mice. Black arrows indicate chromosome Y.

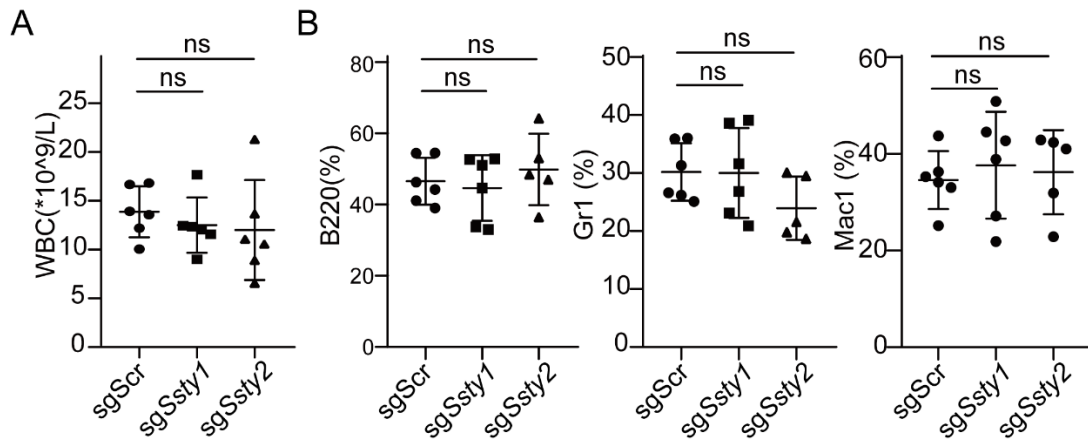

**Supplementary Figure 5. The effect of mLOY on hematopoiesis in mice.**

**A.** White blood cell counts (WBC) of recipient mice at 9 weeks after transplant with sgScr-sgCas9, sg*Ssty1*-sgCas9, sg*Ssty2*-sgCas9 HSPCs, showing as means  $\pm$  SD. n=6, ns, not significant (One-way ANOVA). **B.** Percentages of B220+(left, n=6,6,5), Gr1+(middle, n=6,6,5), and Mac1+(right, n=6,6,5) cells in PB of recipient mice transplanted with sgScr-sgCas9, sg*Ssty1*-sgCas9 and sg*Ssty2*-sgCas9 HSPCs, measured by flow cytometry, ns, not significant (One-way ANOVA).

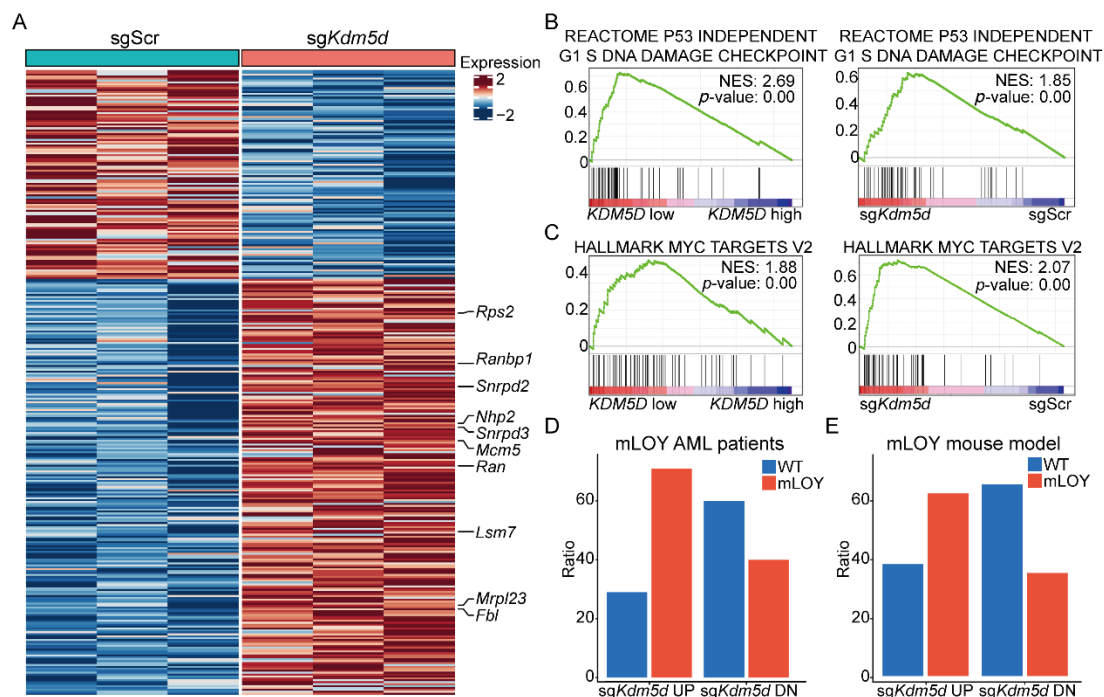

**Supplementary Figure 6. The transcriptomic analyses of *KDM5D* deficient cells.**

**A.** Heatmap showing the differentially expressed genes (DEGs) in *sgKdm5d* HSPCs compared to those with *sgScr*. **B.** GSEA showing the positive enrichment of the Reactome\_P53\_independent\_G1\_S\_DNA\_damage\_checkpoint pathway in AML patients with *KDM5D* low expression and *sgKdm5d* HSPCs. **C.** GSEA showing the positive enrichment of Hallmark\_MYC\_targets\_V2 pathway in AML patients with *KDM5D* low expression and *sgKdm5d* HSPCs. **D-E.** The proportion of *sgKdm5d* HSPC UP and DOWN signatures (top200 significantly up- and down-regulated genes) in the mLOY AML patients (D) and mLOY AML mouse model (E) compared with control.



Cytogenetics

|                   | AML1-ETO | PML-RARA | Complex Cyto. | Normal Karyotype | other fusion | others | All |
|-------------------|----------|----------|---------------|------------------|--------------|--------|-----|
| <i>KDM5D</i> low  | 0        | 3        | 7             | 14               | 6            | 12     | 42  |
| <i>KDM5D</i> high | 3        | 4        | 4             | 16               | 9            | 5      | 41  |
| All               | 3        | 7        | 11            | 30               | 15           | 17     | 83  |

**Supplementary Table 1. The cytogenetics of *KDM5D* low and *KDM5D* high patients in the TCGA LAML cohort.**
